# Supplementary material
Source: publisher figshare collection journal article supplement (https://sage.figshare.com/ndownloader/files/17247092)
Supplement: Supplementary file 1 [file 17247092]

## Sheet: Table 1
Study ID	Title	Year	Main findings
Published articles in MEDLINE database
1	Dietary Carotenoid Intakes and Prostate Cancer Risk: A Case-Control Study from Vietnam	2018	A higher intake of lycopene, tomatoes, and carrots is positively associated with a lower risk of prostate cancer
2	Expression of Plasma hsa-miR122 in HBV-Related Hepatocellular Carcinoma (HCC) in Vietnamese Patients.	2018	"...hsa-miR122 was downregulated in HBV-related HCC patients and found to be lower by approximately 10 fold than in healthy control, resulting in a potential biomarker for microRNA based diagnosis of HCC in human blood."
3	Breast cancer services in Vietnam: a scoping review.	2018	"Breast cancer screening is limited, with no permanent or integrated national screening activities." "There is a lack of information on screening processes and on the integration of screening services with other areas of the health system." "Treatment is largely centralised, and across all services there is a lack of evaluation and data collection that would be informative for recommendations see…
4	Mutational screening of germline RB1 gene in Vietnamese patients with retinoblastoma reveals three novel mutations.	2018	"Germline mutations in RB1 were identified in 25 (73.53%) of 34 patients (four unilateral and 21 bilateral cases). Of these mutations, 19 were detected, including seven nonsense, six frameshift, four splice-site (one was identified in two siblings), and one missense, with Sanger sequencing. Three novel frameshift mutations were discovered in one unilateral and two bilateral patients."
5	Evaluation of Opportunities to Improve Hematopathology Diagnosis for Vietnam Pathologists.	2017	At each hospital, 7 to 11 hematopathology cases were reviewed. Exact/complete diagnostic concordance was less than or equal to 50% for all hospitals. The major barriers to the accuracy of diagnosis included: limitations of immunohistochemical stains, limited stains available, and difficulty with immunohistochemistry result interpretation.
6	Household Financial Burden and Poverty Impacts of Cancer Treatment in Vietnam	2017	37.4% of households with a cancer patient were pushed into poverty due to treatment costs
7	Cervical cancer treatment costs and cost-effectiveness analysis of human papillomavirus vaccination in Vietnam: a PRIME modeling study	2017	The cost of cervical cancer treatment in Vietnam depends on type of hospital and treatment options, which range from $368 to $11,400 USD
8	Global trends in the burden of liver cancer.	2017	Vietnam had a high incidence and mortality rate for cancer (ASR for incidence: 24.6/100,000, ASR for mortality: 23.7/100,000). The authors of this study identified a trend which suggests an earlier onset of the disease in countries like Vietnam
9	Policy and priorities for national cancer control planning in low- and middle-income countries: Lessons from the Association of Southeast Asian Nations (ASEAN) Costs in Oncology prospective cohort study.	2017	In Vietnam, the one-year incidence rate for cancer mortality is 25% and financial catastrophe is 68%, which is the highest in the ASEAN region
10	Risk Factors of Female Breast Cancer in Vietnam: A Case-Control Study	2017	High breast density, early age at first menarche, low number of pregnancies, low number of live births, and postmenopausal status were significantly associated with breast cancer risk in all women. High breast density, early age at first menarche, low number of pregnancies, hormone use, and physical inactivity were significantly associated with increased breast cancer risk in premenopausal women.…
11	Prevalence of Cervical Infection and Genotype Distribution of Human Papilloma Virus Among Females in Da Nang, Vietnam.	2017	38 women (9.5% of the sample) had high-risk HPV infection. The most common HPV types were 16, 18, 58 and 59. There were significant differences regarding HPV infection status between the two study districts, age groups, occupation, and contraceptives used.
12	Caseness rates and risk factors for depression among Vietnamese cancer patients	2016	The overall prevalence of serious depression was 28% among cancer patients, which is 10–15% higher as compared to general population
13	A causal model for fatigue in lung cancer patients receiving chemotherapy.	2016	Insomnia had the largest direct effect on fatigue and could be a promising factor for a future fatigue control program. Dyspnea was shown to have higher effect on fatigue as compared to cough. Given the interactions among fatigue, dyspnea, and cough, a comprehensive programs, which simultaneously address these three problems, could be a promising approach to control fatigue in cancer patient
14	Epidemiology and prevention of prostate cancer in Vietnam	2014	The prevalence of prostate cancer was relatively low in Vietnam, but several reports showed an upward trend in recent years as ASR more than doubled from 2.2/100,000 men in 2000 to 4.7/100,000 men in 2010 The review did not find any study in regard modifiable risk factors except for one in vitro experiment, which illustrated "the inhibitory effect of garlic on the growth of prostate cancer cells"
15	Comparison of long-term outcome between white and Vietnamese children treated for acute lymphoblastic leukemia according to the FRALLE 2000 protocol.	2014	Relapse-free survival was worse in Vietnamese children as compared to White children (HR: 4.48). "Time interval before the first intrathecal therapy and differences in the management of drug related toxicity" could be partial explainations as to why there is a poor outcome in Vietnamese children. More studies were needed to assess the "contribution of socioeconomic factors and/or variations in ph…
16	A consensus plan for action to improve access to cancer care in the association of Southeast Asian Nations (ASEAN) region	2014	"The current state of cancer care and prevention in ASEAN is incompatible with the socioeconomic changes taking place in the region. Mounting lifestyle-related cancer risks are fuelling a cancer epidemic that threatens to overwhelm the region unless governments take urgent action." "The Jakarta call for action on cancer control and the ACTION study provide a rich foundation on which to build comp…
17	Cancer control programs in East Asia: evidence from the international literature	2014	"The present review concerns elements of cancer control programs established in China, Taiwan, Korea, and Japan in North-East Asia, Viet Nam, Thailand, Malaysia, and Indonesia as representative larger countries of South-East Asia for comparison, using the published literature as a guide." "While major advances have been made, there are still areas which need more attention, especially in South-Ea…
18	Screen-and-treat approach to cervical cancer prevention using visual inspection with acetic acid and cryotherapy: experiences, perceptions, and beliefs from demonstration projects in Peru, Uganda, and Vietnam.	2013	Public cervical cancer screening programs in 3 countries: Peru, Uganda, and Vietnam, illustrated that the combination of both VIA and cryotherapy is a feasible approach. "Mobilizing and educating communities, organizing services to meet women’s schedule sand needs, and strengthening systems to track clients for follow-up" could help to ensure programs' success. An adequate number of trained provi…
19	Mortality attributable to smoking in Vietnamese men in 2008	2013	28% of all adult male deaths in Vietnam in 2008 was attributable to smoking if "lung cancer was used to measure cumulative smoking exposure"
20	Cost of treatment for breast cancer in central Vietnam.	2013	In central Vietnam, the average direct medical cost of a 5-year breast cancer treatment plan was $975 per patient (ranged from $11.7 to $3,955). The greatest proportion of total costs (64.9%) was initial treatment cost, especially the cost of chemotherapy. The main factor which limits service uptake was the lack of health insurance.
21	Prevalence of cervical infection with HPV type 16 and 18 in Vietnam: implications for vaccine campaign	2013	The prevalence of HPV type 16 and/or 18 infection among married women ranged from 3.1% to 7.4%. Other common types of high risk HPV among participants were types 35, 45, 52, and 58. Only about one-third of women have ever heard about HPV, HPV vaccine and were aware that HPV is a risk factors of cervical cancer. The level awareness differed vastly across geographical areas.
22	Survival probability and prognostic factors for breast cancer patients in Vietnam.	2013	"Overall survival rates at 1, 3, and 5 years following diagnosis were 0.94, 0.83 and 0.74 respectively". "5-year survival rate of breast cancer patients in Vietnam was lower compared to other countries with similar distributions of the stage at diagnosis". Decreased risk of death was associated with "Marital status (unmarried women), higher education level, earlier stage at diagnosis, and using h…
23	Human papillomavirus type distribution in invasive cervical cancer and high-grade cervical intraepithelial neoplasia across 5 countries in Asia.	2013	HPV DNA was found in 97% of invasive cervical cancer cases. The most common types were HPV 16 (50%), HPV 18 (35.4%), and HPV 52 (6.2%).
24	Reproductive factors in relation to ovarian cancer: a case-control study in Northern Vietnam.	2012	Ever use a parity and/or intrauterine device were associated with a decreased risk of ovarian cancer "Induced abortion, late menopause, and years of ovulation" were associated with an elevated risk of ovarian cancer.
25	Prevalence of cervical human papilloma virus infection among married women in Vietnam, 2011.	2012	The HPV infection prevalence among married women ranged from 6.1% to 10.2%. The most common types were HPV 16, 18 and 58. Most of HPV positive cases were high risk. More than 90% of HPV positive cases were high risk in Hanoi and Can Tho.
26	Lessons learned from successful Papanicolaou cytology cervical cancer prevention in the Socialist Republic of Vietnam.	2012	In 1996, the burden of cervical cancer in Vietnam was shown to be associated with troop movements during the Vietnam War. Based on that finding, the Viet/American cervical cancer prevention project established a Papanicolaou screening service and recorded a reduction in cervical cancer incidence from 29.2/100,000 women in 1998 to 16/100,000 women in 2003
27	Prevalence of cervical human papillomavirus infection among married women in Hanoi, Vietnam, 2010	2012	The prevalence of HPV infection among married women in Hanoi was 6.13%. The 5 most common HPV types were 16, 18, 45, 58, and 81. Younger women had a higher HPV prevalence as compared to older woman. 91.3% of HPV positive cases were high risk HPV.
28	Clinical, endoscopic and pathogical characteristics of early-onset colorectal cancer in Vietnamese	2012	The proportion of early-onset colorectal cancer cases in Viet Nam was 28%, and the male-to-female ratio was 1.3. Colorectal cancer in Vietnam seems to appear at earlier age than the recommended age for screening by the Asia Pacific consensus. Family history was associated with increased risk of early-onset colorectal cancer.
29	The burden of cancer in member countries of the Association of Southeast Asian Nations (ASEAN)	2012	"It was estimated there were over 700,000 new cases of cancer and 500,000 cancer deaths in ASEAN in the year 2008, leading to approximately 7.5 million DALYs lost in one year." "The most commonly diagnosed cancers were lung (98,143), breast (86,842) and liver cancers (74,777). The most common causes of cancer death were lung cancer (85,772), liver cancer (69,115) and colorectal cancer (44,280)." …
30	Cervical human papilloma virus infection among the general female population in Vietnam: a situation analysis.	2011	The prevalence of HPV infection was 6.13% in Hanoi and 8.27% in Ho Chi Minh City. Ho Chi Minh City had a higher proportion of women with multiple HPV infection than in Hanoi (35.5% vs. 17.4%). Risk factors for HPV infection were early age at first sexual intercourse, number of lifetime sexual partners, and any use oral contraceptives.
31	Mass screening of prostate cancer in Vietnam: current status and our opinions.	2010	Prevalence of prostate cancer was low in the population (2,5%), but a high occurrence of medium grade lesions (Gleason 7) was observed among patients with positive prostate cancer test result. The benefit of a mass screening program was not proven. Selective screening could be beneficial for early diagnosis and treatment.
32	Temporal trends of cancer incidence in Vietnam, 1993-2007.	2010	"Cancer incidences in general have continuously increased during 1993-2007". "More efforts should be concentrated on developing and implementing tobacco-related cancer prevention interventions".
33	Genetic polymorphisms in GSTA1, GSTP1, GSTT1, and GSTM1 and gastric cancer risk in a Vietnamese population.	2010	The homozygous wild-type GSTA1 genotype was associated with gastric cancer. No relationship with polymorphisms in GSTP1, GSTT1, or GSTM1 was found.
34	Quinacrine sterilization and gynecologic cancers: a case-control study in northern Vietnam.	2010	"No evidence of a relationship between quinacrine sterilization and gynecologic cancer" was found.
35	Epidemiology of cholangiocarcinoma: an update focusing on risk factors.	2010	Opisthorchis viverrini and Clonorchis sinensis liver flukes were common in Vietnam with nearly a million cases. C. sinensis is widespread in northern Vietnam (prevalence ranged from 5% to 26%) O. viverrini is endemic in the central and southern Vietnam Both of these infections were link to the habit of eating raw or undercooked fish
36	Cancer epidemiology in mainland South-East Asia - past, present and future	2010	Incidence of liver, lung, stomach, and nasopharyngeal cancer were high in Vietnam
37	Predicting lung cancer death in Africa and Asia: differences with WHO estimates.	2009	Smoking was responsible for 85% of lung cancer death in male in Vietnam. The number of lung cancer deaths each year could double by 2025 even if the smoking prevalence stops increasing.
38	Geographic variation in the prevalence of Kaposi sarcoma-associated herpesvirus and risk factors for transmission.	2009	The prevalence of Kaposi's sarcoma-associated herpesvirus (KSHV) in Hanoi was 11.26% and in Ho Chi Minh City was 15.50%. The prevalence of KSHV slightly increased with a higher age in areas with elevated prevalence of KSHV, and it decreased with subjects’ higher educational level attained. KSHV was not associated with "age at first sexual intercourse, number of sex partners, number of children, p…
39	Cooking temperature, heat-generated carcinogens, and the risk of stomach and colorectal cancers	2009	"A high intake of roasted meats, bread and biscuit significantly increased the risk of cancer"
40	Epidemiology and prevention of cervical cancer in Indonesia, Malaysia, the Philippines, Thailand and Vietnam.	2008	HPV-16 was the most common HPV type in Vietnam, followed by 58, 56, and 18. At least, there will be 6,000 new cases of cervical cancer and 3,000 deaths each year. Among for women ages 15–44 years, cervical cancer was the second most common cancer. The Vietnam National Strategy for Cancer Control up to 2020 aimed to reduce cervical cancer mortality rate and decrease the proportion of advanced stag…
41	Mathematical models of cervical cancer prevention in the Asia Pacific region.	2008	"Vaccination of young adolescent girls against HPV-16 and -18 could be very cost-effective if the cost per vaccinated girl is less than I$10–I$25"
42	Exploring the cost-effectiveness of HPV vaccination in Vietnam: insights for evidence-based cervical cancer prevention policy.	2008	"When the cost per vaccinated girl was low (i.e., <I$25 - <$5 per dose) was vaccination combined with screening (three times per lifetime or every 5 years) favored in both regions". "At high costs per vaccinated girl (i.e., >I$100), screening alone was most cost-effective".
43	An enormous hepatitis B virus-related liver disease burden projected in Vietnam by 2025.	2008	Estimated chronic HBV prevalence increased from 6.4 million cases in 1990 to around 8.4 million cases in 2005 and was projected to decrease to 8.0 million by 2025. Estimated HBV-related HCC incidence increased from 9,400 in 1990 to 25,000 in 2025. Estimated HBV-related mortality increased from 12,600 in 1990 to 40,000 in 2025. In the next 20 years, universal infant HBV vaccination would reduce ch…
44	Betel quid chewing, oral cancer and other oral mucosal diseases in Vietnam: a review	2008	Betel quid chewing was declining in Vietnam. Only 6.7% of the female population maintained this habit.
45	Gastric and colo-rectal cancer mortality in Viet Nam in the years 2005-2006.	2008	"Stomach cancer mortality in males in the region of North East in the North Viet Nam (2005-06) was higher than that in Japan (2002) (31.3 versus 28.7 per 100,000) while colorectal cancer in Viet Nam was lower."
46	Highly endemic hepatitis B infection in rural Vietnam.	2007	68.2% of participants had evidence of HBV exposure. Risk factors for HBV included Age 60 years or older, hospital admission, history of acupuncture, household contact with a person with liver disease, reusing syringes, and sharing razors
47	Vietnam: integrating palliative care into HIV/AIDS and cancer care.	2007	Based on a rapid situation analysis, the Vietnam Ministry of Health developed a new National palliative care guidelines. Plans at that time called for the revision of opioid laws and regulations in Vietnam to "increase availability of opioids for medical use, training in palliative care for clinicians throughout the country, and development of palliative care programs both in the community and in…
48	Population-based cancer survival in sites in Viet Nam	2007	"Males and females combined, for all cancer sites, 1-year, 2-year, 3-year, 4-year and 5-year observed and relative survival rates were 23.8%-23.9%, 8.5%-8.5%, 3.8%-3.8%, 2.6%-2.6%, 1.7%-1.7%, respectively." "The highest one-year relative cancer survival rate was seen in the capital, Hanoi city (49,8%), followed by Hue city in the central area (24,7%), and the lowest in Phu Tho, north-semi-highlan…
49	Cancer mortality pattern in Viet Nam	2007	"Number of cancer deaths was 45,413 (29,189 males and 16,224 females) in 2005 and 48,306 (31,447 males and 16,859 females) in 2006. Male to female ratios were 1.8 and 1.9 in 2005 and 2006, respectively." "Three most common cancer sites numbered of 61,079 (65% of all 93,719 cancer deaths) included 25,410 liver cancer; 22,209 lung cancer; and 13,460 stomach cancer." "Among both males and females, l…
50	Status of cancer pain in Hanoi, Vietnam: A hospital-wide survey in a tertiary cancer treatment center.	2006	The prevalence of moderate to severe pain among cancer patients was very high - 50% "with 23% reporting severe ratings of pain at its ‘‘worst’’ and 33% reporting severe impairment in their ability to work due to pain". "Only 1% and 40% reported total and partial pain relief from medications, respectively."
51	Anti-smoking initiative and decline in incidence rates of lung cancer in Viet Nam	2006	National Tobacco Control Program, which was implemented in 1989, helped to reduce the incidence rate of lung cancer
52	Development of population-based cancer mortality registration in the North of Viet Nam.	2006	"During 4,330,620 person-years estimated during 1999 to 2005, 21,108 deaths were registered." "The crude death rate from all causes was 487.4/100,000." "Among them, 4,244 cancers in all sites (2,835 in males and 1,409 in females) were registered, giving mortality rates / 100,000of 134.6 and 63.3 (crude), and 155.7 and 54.3 (ASR), for males and females, respectively." "The rate for the high-mounta…
53	Differences in breast cancer risk factors by tumor marker subtypes among premenopausal Vietnamese and Chinese women.	2005	First born girls aged > 25 years who drank alcohol were associated with increased breast cancer risk. Family history, age at menarche, cumulative lactation, body mass index, and education were not associated with breast cancer risk. Parity and age at first birth were significantly associated with ER and/or HER-2/neu tumor status.
54	Association between war and cervical cancer among Vietnamese women.	2004	The risk of invasive cervical cancer issignificantly associated with troop movements during the Vietnam War and with parity status. The women whose husbands enrolled in military services were at higher risk for cervical cancer (OR: 2.6-3.9) depend on the geographical areas.
55	Human papillomavirus infection among women in South and North Vietnam	2003	HPV DNA was identified in 2% of women in Hanoi and 10.9% of women in Ho Chi Minh City. 30 different HPV strains were detected, the most common types were 16, 58, 18, and 56. Risk factors for HPV infection were sexual habits,the presence of Herpes Simplex Virus 2 (HSV-2) antibodies, giving childbirth, and current use of oral contraceptives.
56	The situation with cancer control in Vietnam.	2002	In 1990, cancer incidence in Vietnam was 133/100,000 in men and 91.7/100,000 in women In 1990, the mortality rate was 105.9/100,000 in men and 58.5/100,000 in women. In 1990, Vietnam had about 52,700 new cancer cases and 37,700 deaths from cancer. The leading cancers in men were lung, liver, stomach, colorectum, and nasopharynx. The leading cancers in women were breast, cervix, stomach, liver, co…
57	Estimates of cancer mortality in Hanoi and Ho Chi Minh City, Viet Nam in the 1990s	2002	"The correlation between cancer mortality to incidence ratios and relative survival probabilities for 23 cancer sites was estimated according to SEER(1973-97)" "Cancer mortality rate for all cancer sites except skin(ASR per 100, 000)was 103.9 for males and 52.4 for females in Hanoi, and 93.7 for males and 60.7 for females in Ho Chi Minh." "For males, the five most common cancer deaths were cancer…
58	De novo establishment and cost-effectiveness of Papanicolaou cytology screening services in the Socialist Republic of Vietnam.	2001	"Total costs to establish a nationwide 5‐year interval Pap screening program in Vietnam will average less than $148,400 annually during the 10‐year time period assumed necessary to develop the program and may be considerably lower if only high risk geographic areas are targeted." "Maintenance costs will average less than $0.092 annually per woman in the target screening population. Assuming 70% p…
59	Analysis of lifestyle data and cytologic findings in a pilot cervical screening project in rural Vietnam.	1999	"The smears from farmers showed the greatest ecologic disturbances in vaginal flora. Water supply turned out to be important for coccoid overgrowth. Scores for both fungal infection and coccoid overgrowth were related to profession." "Candidosis proved to be very prominent in cytologically negative smears: the organisms were found (often in abundance) in 95 of 661 negative smears but were absent …
60	Cancer incidence in Ho Chi Minh City, Viet Nam, 1995-1996.	1998	"A total of 4,080 cancer cases in males and 4,338 in females were registered, corresponding to age-standardized incidence rates (ASRs) of 130.9 per 100,000 in men and 100.7 per 100,000 in women. "As elsewhere in South East Asia, the principal cancer of men was liver cancer (ASR 25.3), with moderately high rates of lung cancer (ASR 24.6) and stomach cancer (ASR 16.5); cancer of the penis, reported…
61	Blood levels of DDT and breast cancer risk among women living in the north of Vietnam	1997	Recent and past exposure to Dichlorodiphenyltrichloroethane was not associated with breast cancer among Vietnamese women
62	Agent orange and the risk of gestational trophoblastic disease in Vietnam	1996	Agent Orange and pesticides exposure did not seem to be associated with Gestational trophoblastic disease
63	Viral infections and chemical exposures as risk factors for hepatocellular carcinoma in Vietnam	1993	HBsAg positivity, alcohol use, excessive pesticides exposure, and military service in the south of Vietnam > 10 years were associated with an increased risk of HCC
Published articles in electronic databases at Hanoi Medical University library, Hanoi University of Public Health library, and Vietnam Oncology Journal collections at the National Cancer Hospital
64	The status and future of cancer control in Vietnam	2018	Limited resources and low coverage of service did not meet the increasing demand of the population. Pilot screening programs were conducted on a small scale The coordination between cancer treatment and prevention is limited
65	Quality of life of breast cancer patients measured by QLQ-C30 and related factors in Oncology hospitals in Vietnam	2017	"The results showed that the global health status score was in the average level (58.6 points); the physical function score (mean = 85.8 points) and cognitive function score (mean = 78.6 points) were highest, functional score (mean = 71.7 points), function emotional score (mean = 70.6 points) and social function score (mean = 67.1 points) were lowest." "The score for anorexia was 26.6 points; ins…
66	Investigation of the potential association between endocrine disrupting chemicals (EDCs) and breast cancer risk in Viet Nam	2017	An increment of 1 μg/L in blood cadmium levels was associated with a higher risk of breast cancer (OR=14.96, CI 95%: 9.38 – 23.84). The odds of developing breast cancer in women with blood cadmium levels above 3 μg/L was 2.7 times higher than those with levels lower than 3 μg/L.
67	Impact of communication intervention on cervical cancer screening intention among married women aged 15-49 in Chi Linh, Hai Duong	2017	"90,6% women have had cervical cancer screening intention." "Exposing to the communication intervention impact signifcantly on cervical cancer screening intention of women in Chi Linh, increasing by 7,9% (corresponding to 158 women)"
68	Cervical cancer screening rate and its related factors among work women at two companies in Go Vap district, Ho Chi Minh city	2016	Only 35.2% of the participant reported that they have had a Paps smear test, and 28.3% reported that they had a Paps smear test within the last 3 years
69	Diagnostic value of Cervical Cancer Screening using VIA and Pap Smear methods for women aged from 30 to 65 in Bac Ninh and Can Tho, 2013	2015	"Out of 1945 participants, VIA was positive in 8.1% of subjects and PAP was abnormal in 6.1%." "In some cases where CIN1 or more were used as the standard for abnormal cases, both VIA and PAP have high sensitivity, responding to 85.71% (95% CI: (65.36-95.02) and 90.47% (95% CI: 71.09-97.35). The specificities of two tests were equivalent, 68.12% (95% CI: 63.60-72.32) for VIA and 77.06% (95% CI: 7…
70	Cost-effectiveness of population-based mammography and clinical breast examination screening strategies in Vietnam	2015	"The results showed that the screening using mammography is very costeffective with an ICER of 37,093,610 VND per 1 adjusted life year quality of life (QALY) gained (discounted by 3% / year). The budget impact analysis within 5 years after deployment screening showed that the costs of screening within five years of the plan combined mammography and clinical breast examination is the biggest (351.…
71	Results of the national cancer program 2011–2014	2014	The health system only records pathology results from 48% of patients who were diagnosed and received cancer treatment
72	The cancer incidence of Vietnam in 2010 with reported data of 6 areas from 2004-2008	2010	There were 70,028 new cases annually in these areas. The leading cancers are lung, stomach, liver, colorectum, and esophagus for males; and breast, colorectum, lung, cervix, and stomach for females The incidence of cervical and oral cancer was also decreasing
73	Results of the national cancer program 2008–2010	2010	9/63 provincial hospitals did not have pathology departments, and 10/63 were unable to provide services for cancer patients.
74	The screening results for early detection of breast and cervical cancer in some cities and provinces from 2008 to 2010	2010	70,980 women from 35 to 60 years old received screening services. Among them, 0.06% of the women were diagnosed with breast cancer, and 0.02% diagnosed with cervical cancer
Relevant grey literature from Vietnamese governmental agencies, international organizations, and non-governmental organizations
75	Vietnam Decisions and guidelines for cancer diagnosis and treatment (Decree 5250, 2549, and 4825/QĐ-BYT)	2012-2018	Vietnam had developed 3 national guidelines for non-small cell lung cancer, colorectal cancer, and liver cancer Cancer surgery should be conducted at provincial/national level hospitals, but benign tumors could be surgically removed at district levels hospitals.
76	Global Cancer Observatory - Vietnam Population fact sheets	2018	There were 164,671 new cases and 114,871 cancer death in Vietnam in 2018 There were 300,033 people currently living with cancer in Vietnam (5-year prevalent cases). Regardless of sex, liver cancer remains the most common cancer and number one killer (25,335 new cases; 25,404 deaths) followed by lung (23,667 new cases; 20,710 deaths), stomach (17,527 new cases; 15,065 deaths), and breast (15,229 c…
77	Global Initiative for Cancer Registry Development Partners Task Force Visit to Vietnam	2017	"PBCRs are viewed as a priority for Việt Nam with strong support and a good level of understanding noted at all levels for the role of cancer registration. The MOH has designated the Hanoi PBCR to manage the National Registry, with responsibilities to conduct annual training courses, consolidate data and generate publications. The main challenges experienced by the registries include: incomplete …
78	Cancer Control in Vietnam: Where are we?	2016	"The main components of the National Cancer Control Plan are raising awareness of people in the community, the screening and early detection of preventable cancers, improving the knowledge of health-care staff and strengthening monitoring and cancer registry" "There are still challenges, which include resources, policy development and improving the partnerships for cancer control."
79	Global Oncology Trends 2017	2016	42 new cancer drugs were launched during the 2011-2015 period, and only one of them was available in Vietnam.
80	National action plan on prevention and control of cervical cancer 2016-2025	2016	"Specific objectives 1: Increase the awareness at all levels of the government and the understanding of the community understanding, including health workers, regarding cervical cancer prevention and control. Targets: - 100% of provinces and cities under central authority have cervical cancer prevention and control plans; - 70% of adults have correct knowledge regarding cervical cancer and its pr…
81	Vietnam Joint annual health review 2014. Strengthening prevention and control of non-communicable disease	2015	The shortage of trained personnel, lack of appropriate diagnostic equipment, and the lack of appropriate funding mechanism from the health insurance prevented scale up of cancer screening. With the current resources, the health system can only provide 30–40% of the need for cancer services in Vietnam.
82	National Strategy for the prevention and control of noncommunicable diseases 2015-2025	2015	Specific objectives for 2015-2025: "To minimize behavioral risk factors of cancers, cardiovascular diseases, diabetes, chronic obstructive pulmonary disease and asthma." "To halt the increase of pre-diseases, morbidity and premature death due to cancers, cardiovascular diseases, diabetes, chronic obstructive pulmonary disease and asthma." Specific targets: "- 40% of people with some common cancer…
83	Recommendations for strengthening NCD prevention and control in Vietnam	2011	The current healthcare services in Vietnam are disease-specific and vertically organized. "To improve NCD services, Vietnam should invest in primary care services, build up a monitoring and surveillance systems, and provide training for human resources"
84	Vietnam noncommunicable disease prevention and control programme 2002–2010. Implementation review for the WHO	2011	Recommendation for the establishment of the national target programme for NCD prevention and control (including cancer) "Determine the national model of population based breast and cervical cancer screening for women of target age groups" "Review the health insurance implications of the procedure being undertaken as part of primary health care" "Establish registries to follow up women who have be…
85	Viet Nam Burden of Disease and Injury Study	2011	Cancer is responsible for 22% of total Years of Life Lost (YLL) – nearly 1.5 million years – and came only after cardiovascular diseases (27% of total YLL). Cancers ranked third among leading causes for disease burden in Vietnam and accounted for than 14% of total Disability-Adjusted Life Years (DALYs) – nearly 1.7 million years.
86	Vietnam Health Insurance Agency Decree 62/2009/NĐ-CP: detailed regulations and implementation guidelines of articles related to the Vietnam law on health insurance	2009	80% of cancer services costs (examination and treatment) was covered for most patients with health insurance, and the remaining costs was paid out-of-pocket. Only 50% of costs for certain expensive drugs, which include Trastuzumab and other specialized drugs, are reimbursed by health insurance
87	Vietnam - Overview: National Strategy for Cancer Control (2010 and 2020)	2006	"Viet Nam has proposed a National Strategy for Cancer Control up to 2010 and 2020 with the following objectives: 1. Reduce the incidence of tobacco-related cancers by 30%, compared to the year 2000. 2. Ensure HBV vaccination coverage for all newborns. 3. Reduce breast, cervix, mouth and rectum cancers mortality rates. 4. Decrease the proportion of advanced stage cancers from 80 to 50%. 5. Establi…
Additional published articles identified through bibliographies screening
88	Non-communicable diseases, food and nutrition in Vietnam from 1975 to 2015: the burden and national response	2018	"Adults had an increased prevalence of overweight and obesity (2.3% in 1993 to 15% in 2015) and hypertension (15% in 2002 to 20% in 2015). Among 25-64 years old in 2015, the prevalence of diabetes mellitus was 4.1% and the elevated blood cholesterol was 32%." "Vietnamese had a low physical activity level, a high consumption of salt, instant noodles and sweetened non-alcoholic beverages as well as…
89	Prevalence of tobacco smoking in Vietnam: findings from the Global Adult Tobacco Survey 2015	2017	"The prevalence of smoking in Vietnam was 22.5% overall, 45.3% among men, and 1.1% among women." "The overall 2015-2010 reduction in prevalence of any tobacco product was 5.3%. However, the reduction was not statistically significant."
90	Vietnam National survey on the risk factors of NCDs (STEPS) 2015 report	2016	"High percentage were current drinkers: 77.3% among males, 11% among females and 43.8% overall, and there was a fast increasing trend; Nearly half (45%) of current drinkers drove after drinking in the past 30 days." "More than half (57.2%) of population still not consuming enough of 5 serving per day, however, this figure improved significantly compared to 2010. The percentage not consuming enoug…
